# Supplementary material for: Enhanced photocatalytic performance for oxidation of glucose to value-added organic acids in water using iron thioporphyrazine modified SnO2
Source: Royal Society of Chemistry journal article supplement (doi:10.1039/c9gc01647c), 2019-01-01
Supplement: c9gc01647c1.pdf [file c9gc01647c1.pdf]

## Supporting Information

Enhanced photocatalytic performance for oxidation of glucose to value-added organic acids in water using iron thioporphyrazine modified SnO<sub>2</sub>

Quanquan Zhang, Yanchun Ge, Changjun Yang\*, Bingguang Zhang and Kejian Deng

Hubei Key Laboratory of Catalysis and Materials Science, School of Chemistry and Materials Science, South-Central University for Nationalities, Wuhan 430074, China

\*Corresponding author: yangchangjun@mail.scuec.edu.cn

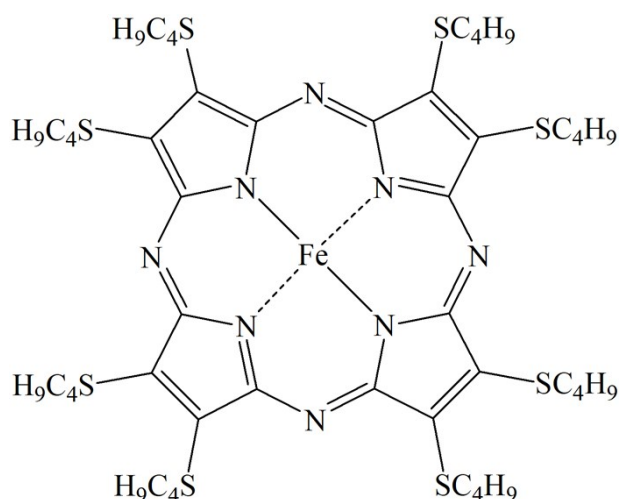

Fig. S1 Molecular structure of FePz(SBu)<sub>8</sub>.

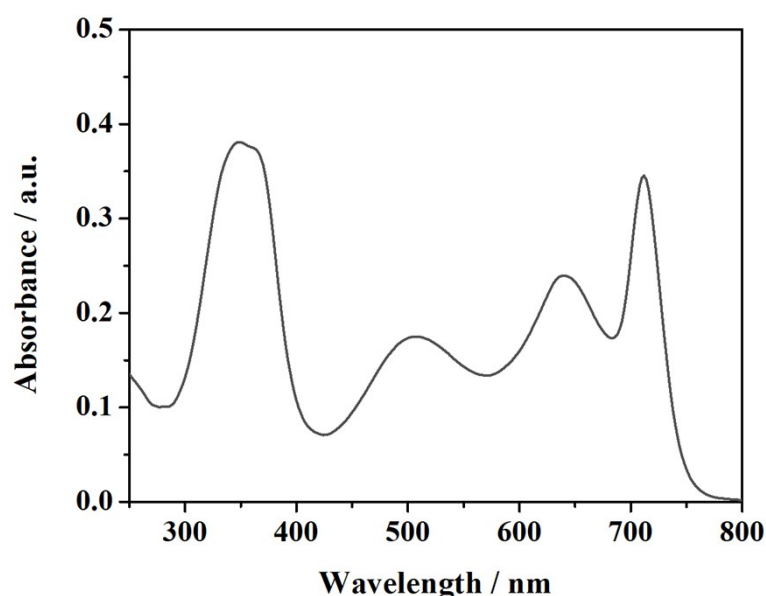

Fig. S2 UV-vis spectrum of metal-free H<sub>2</sub>Pz(SBu)<sub>8</sub> in dichloromethane.

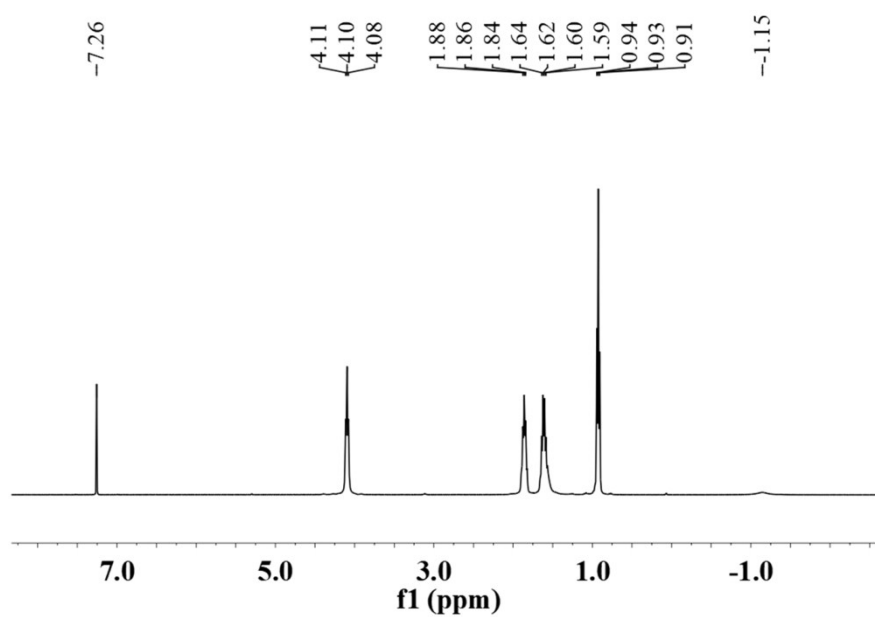

Fig. S3  $^1\text{H}$  NMR spectrum of metal-free  $\text{H}_2\text{Pz}(\text{SBu})_8$  in  $\text{CDCl}_3$ .

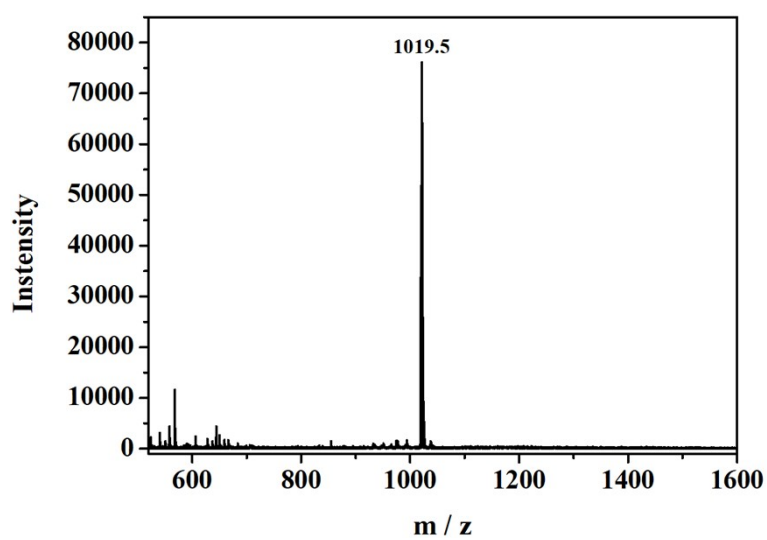

Fig. S4 MALDI-TOF MS of metal-free  $\text{H}_2\text{Pz}(\text{SBu})_8$ .

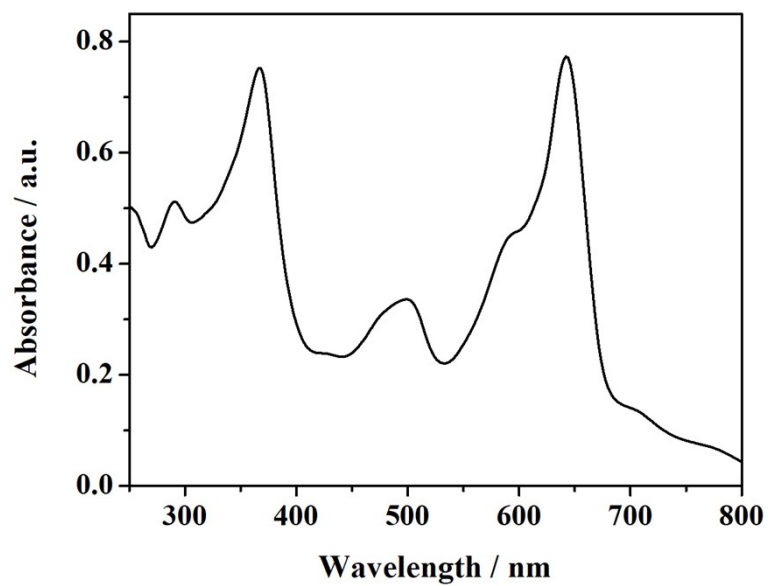

Fig. S5 UV-vis spectrum of FePz(SBu)<sub>8</sub> in dichloromethane.

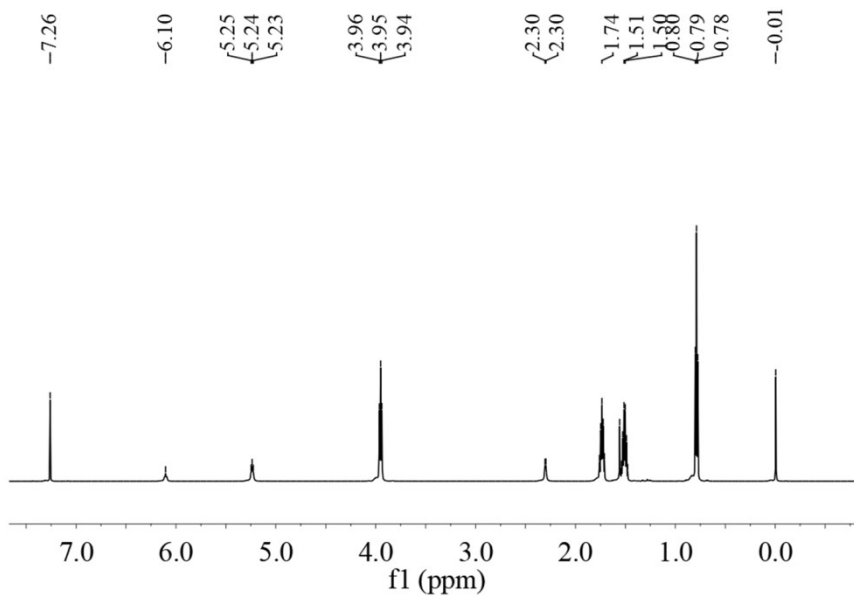

Fig. S6 <sup>1</sup>H NMR spectrum of FePz(SBu)<sub>8</sub> in CDCl<sub>3</sub>.

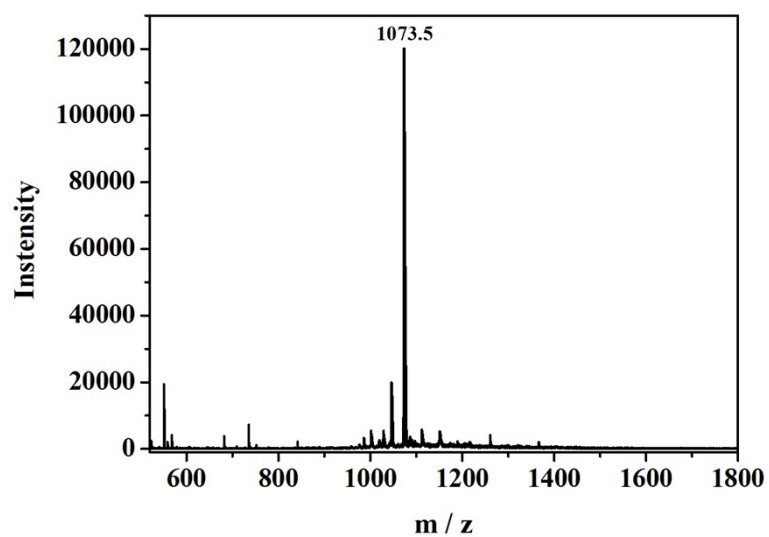

Fig. S7 MALDI-TOF MS of FePz(SBu)<sub>8</sub>.

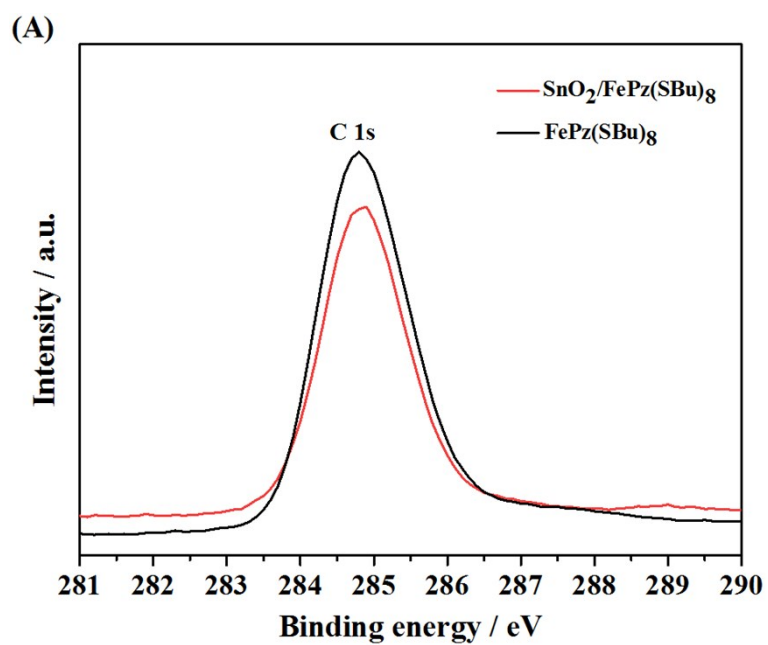

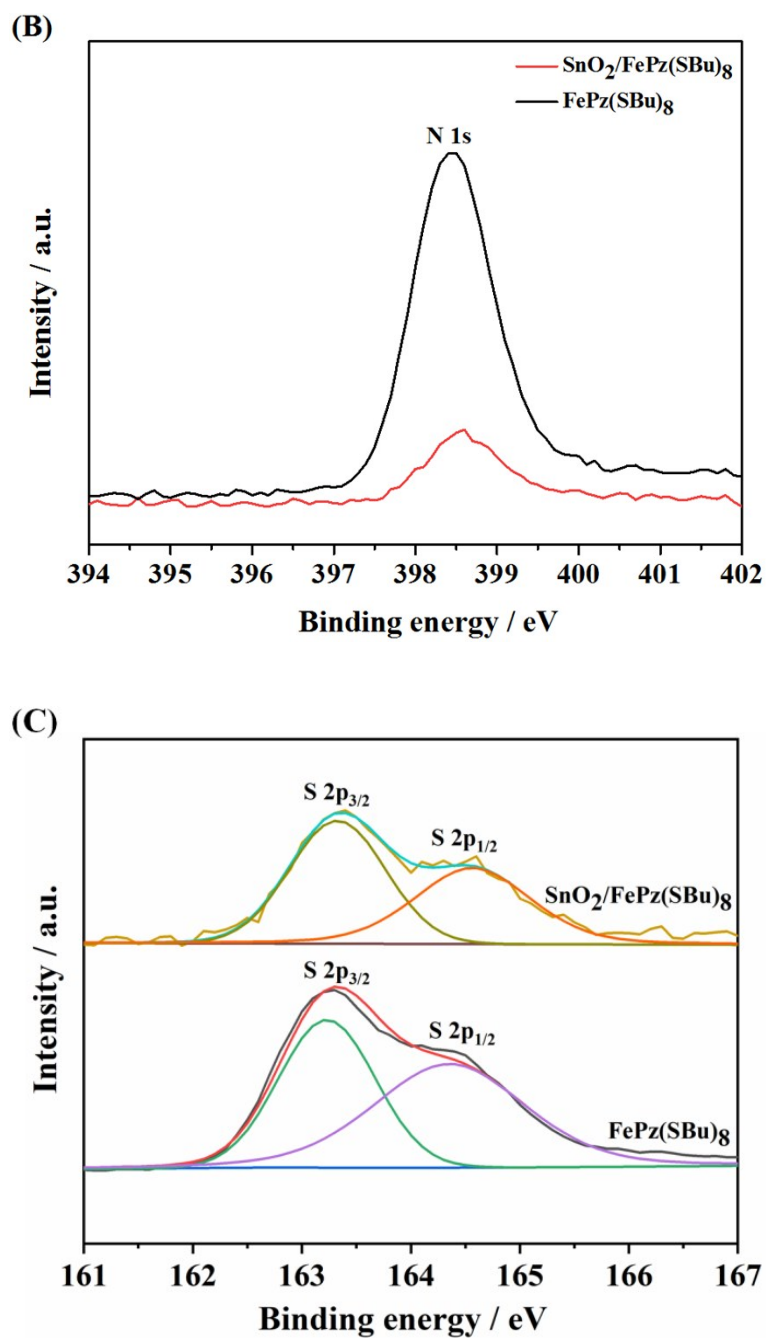

Fig. S8 The high resolution XPS spectra in C 1s (A), N 1s (B) and S 2p (C) region for pure FePz(SBu)<sub>8</sub> and SnO<sub>2</sub>/FePz(SBu)<sub>8</sub> composite.

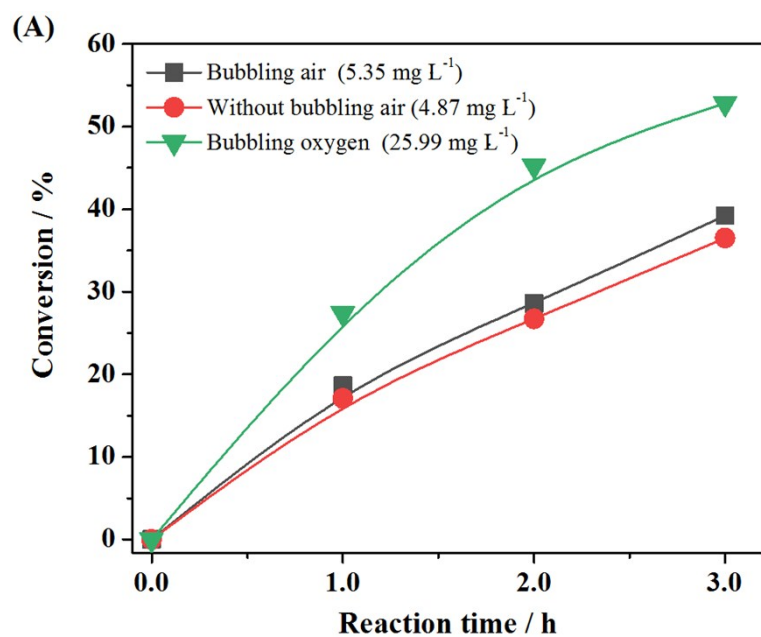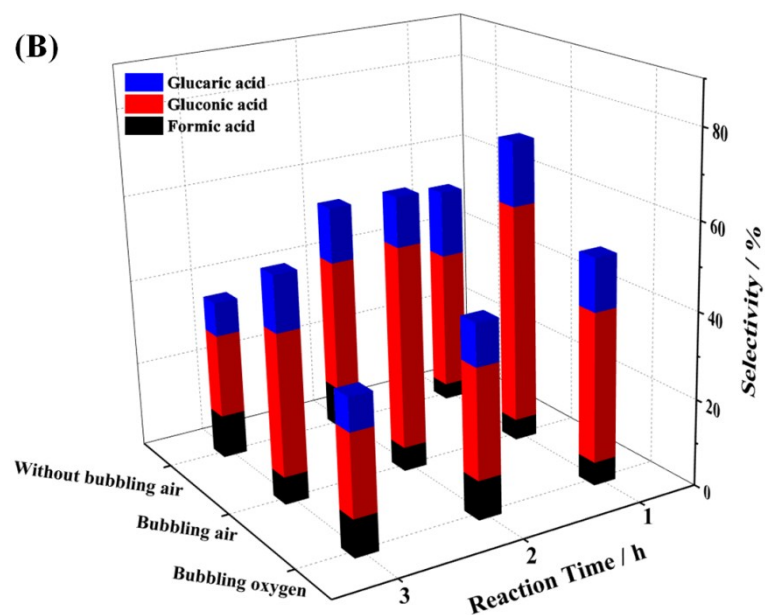

Fig. S9 The effect of dissolved oxygen concentration on the conversion of glucose (A) and the selectivity of organic acid (B). Reaction conditions: catalyst (20 mg), aqueous glucose (1 mmol·L<sup>-1</sup>, 50 mL), light intensity (2 W·cm<sup>-2</sup>).

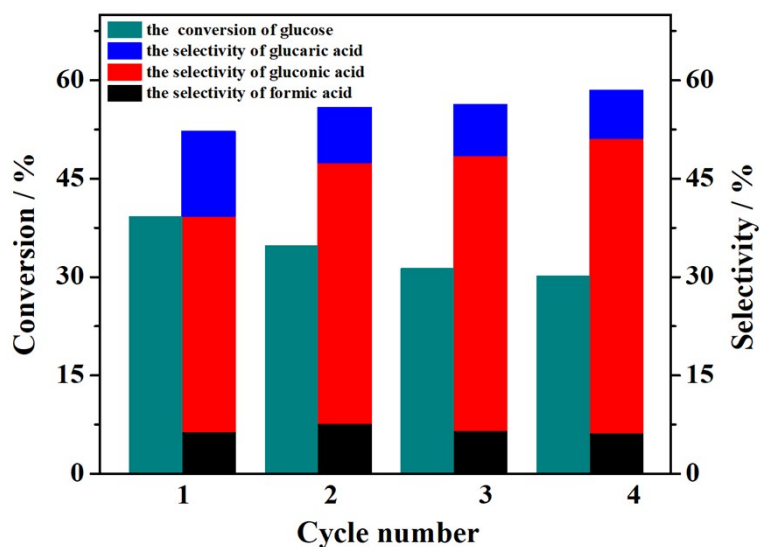

Fig. S10 Reusability of SnO<sub>2</sub>/FePz(SBu)<sub>8</sub>(0.1%) for photocatalytic oxidation of glucose in water under simulated sunlight irradiation. Reaction conditions: SnO<sub>2</sub>/FePz(SBu)<sub>8</sub>(0.1%) (20 mg), aqueous glucose (1 mmol·L<sup>-1</sup>, 50 mL), reaction for 3 h, light intensity (2 W·cm<sup>-2</sup>), air with a flow rate of 0.4 L·min<sup>-1</sup>.

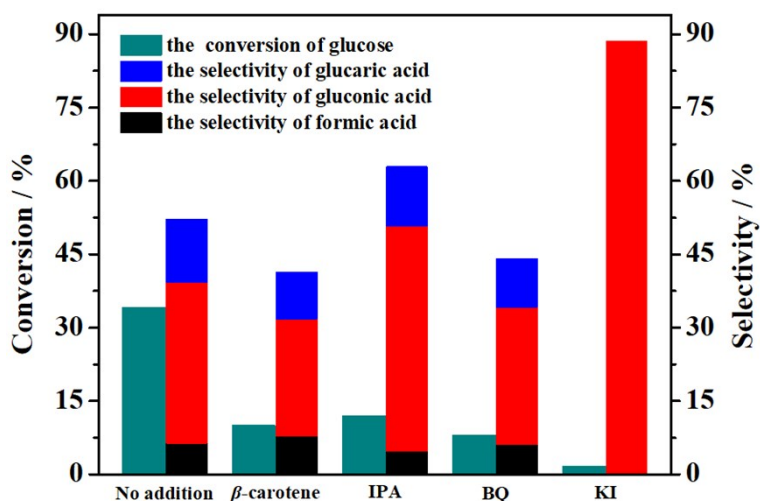

Fig. S11 Effect of scavenger agents on the photocatalytic conversion of glucose in presence of SnO<sub>2</sub>/FePz(SBu)<sub>8</sub>(0.1%) under simulated sunlight irradiation. Reaction conditions: SnO<sub>2</sub>/FePz(SBu)<sub>8</sub>(0.1%) (20 mg), aqueous glucose (1 mmol·L<sup>-1</sup>, 50 mL), light intensity (2 W·cm<sup>-2</sup>), air with a flow rate of 0.4 L·min<sup>-1</sup>, reaction for 3 h. KI (1 mmol·L<sup>-1</sup>), TEMPO (1 mmol·L<sup>-1</sup>), BQ (1 mmol·L<sup>-1</sup>), IPA (1 mmol·L<sup>-1</sup>).

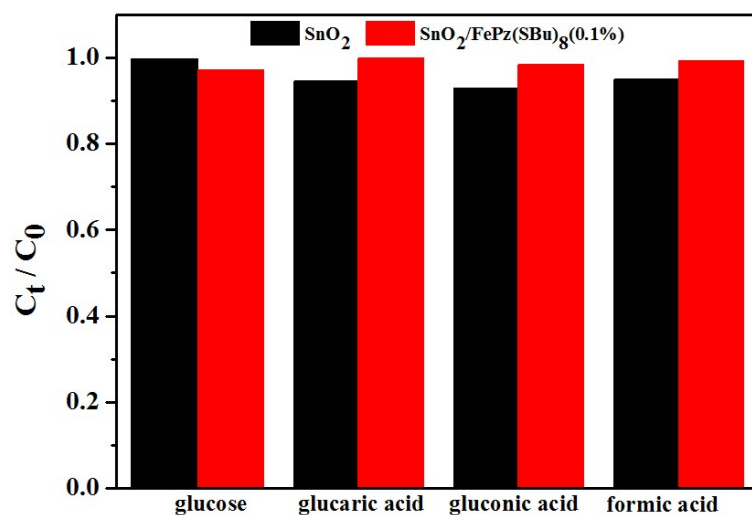

Fig. S12 The adsorption of different substrates on the pure SnO<sub>2</sub> and SnO<sub>2</sub>/FePz(SBu)<sub>8</sub>(0.1%) in the dark for 6 h. The amount of the catalysts was 20 mg. The initial concentration and the volume of the aqueous substrate were 1 mmol·L<sup>-1</sup> and 50 mL, respectively.

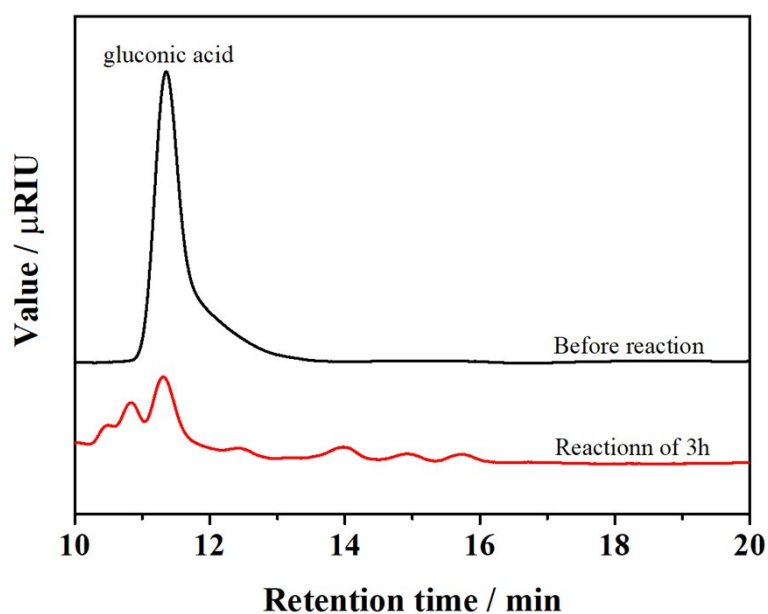

Fig. S13 The photocatalytic oxidation of aqueous gluconic acid in presence of SnO<sub>2</sub>/FePz(SBu)<sub>8</sub>(0.1%) under simulated sunlight irradiation. Reaction conditions: SnO<sub>2</sub>/FePz(SBu)<sub>8</sub>(0.1%) (20 mg), aqueous gluconic acid (1 mmol·L<sup>-1</sup>, 50 mL), light intensity (2 W·cm<sup>-2</sup>), air with a flow rate of 0.4 L·min<sup>-1</sup>.



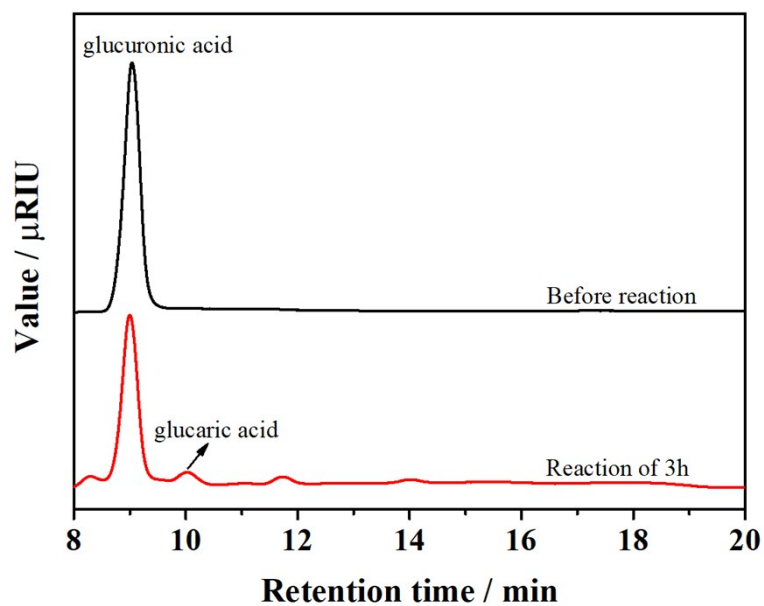

Fig. S14 The photocatalytic oxidation of aqueous glucuronic acid in presence of  $\text{SnO}_2/\text{FePz}(\text{SBU})_8(0.1\%)$  under simulated sunlight irradiation. Reaction conditions:  $\text{SnO}_2/\text{FePz}(\text{SBU})_8(0.1\%)$  (20 mg), aqueous glucuronic acid ( $1 \text{ mmol}\cdot\text{L}^{-1}$ , 50 mL), light intensity ( $2 \text{ W}\cdot\text{cm}^{-2}$ ), air with a flow rate of  $0.4 \text{ L}\cdot\text{min}^{-1}$ .

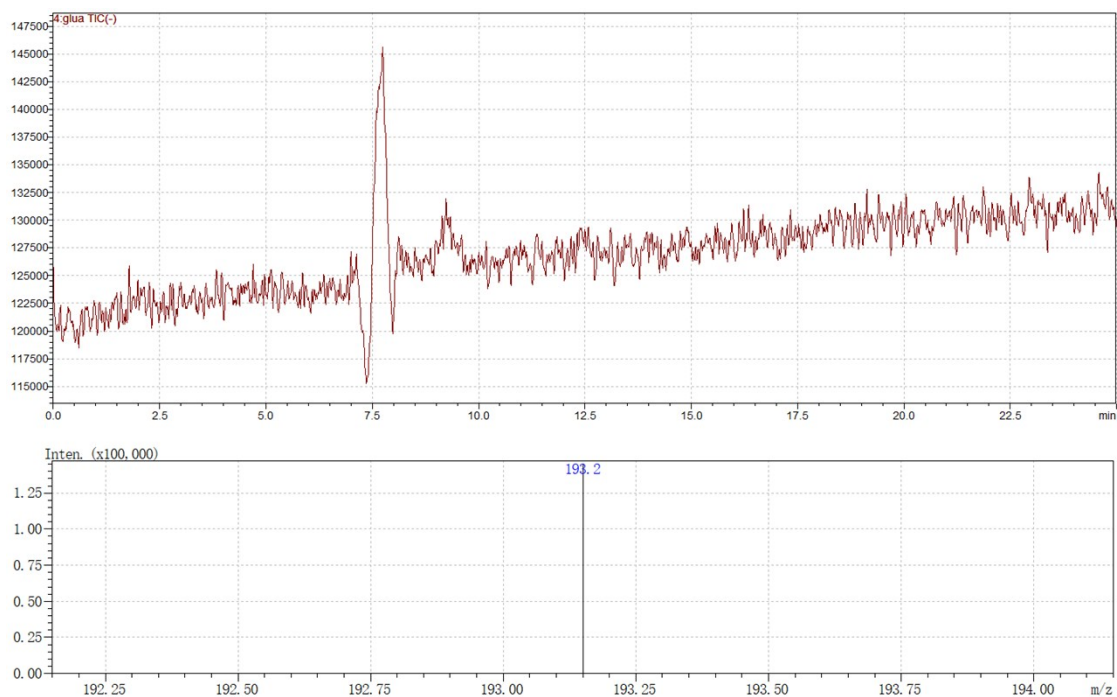

Fig. S15 HPLC-MS spectrum of glucuronic acid generated from the oxidation of aqueous glucose in presence of  $\text{SnO}_2/\text{FePz}(\text{SBU})_8(0.1\%)$ .
